# Supplementary material
Source: PubMed Central journal article supplement (PMC6238965)
Supplement: NIHMS968663-supplement-esi.pdf [file NIHMS968663-supplement-esi.pdf]

Supplementary Information

**Promoting Endothelial Cell Affinity and Antithrombogenicity of  
Polytetrafluoroethylene (PTFE) by Mussel-Inspired Modification  
and RGD/Heparin Grafting**

*Hao-Yang Mi<sup>a,b,c</sup>, Xin Jing<sup>a, b, c\*</sup>, James A. Thomsom<sup>d</sup>, and Lih-Sheng Turng<sup>a,c\*</sup>*

<sup>a</sup>Wisconsin Institute for Discovery, University of Wisconsin–Madison, WI, 53715, USA

<sup>b</sup>Department of Industrial Equipment and Control Engineering, South China University of  
Technology, Guangzhou, 510640, China

<sup>c</sup>Department of Mechanical Engineering, University of Wisconsin–Madison, WI, 53706,  
USA

<sup>d</sup>Morgridge Institute for Research, University of Wisconsin–Madison, WI, 53715, USA

**\*Corresponding authors:**

Lih-Sheng Turng, Tel: 608-316-4310; Email: turng@engr.wisc.edu

Xin Jing, Tel: 86-18578664293; Email: xjing3@wisc.edu

**Table S1.** Atom percentage results of PTFE, P-PTFE, DA-PTFE, RGD-PTFE, and R/H-PTFE from XPS survey scans.

| Atom | PTFE | P-PTFE | DA-PTFE | RGD-PTFE | R/H-PTFE |
|------|------|--------|---------|----------|----------|
| C    | 33.7 | 36.7   | 69.9    | 65.1     | 60.9     |
| O    | 0.1  | 4.1    | 15.3    | 17.3     | 24.2     |
| F    | 66.2 | 59.2   | 9.3     | 9.4      | 7.3      |
| N    | /    | /      | 5.5     | 8.2      | 5.5      |
| S    | /    | /      | /       | /        | 2.1      |

**Table S2.** XPS C1s core-level scans of PTFE, P-PTFE, DA-PTFE, RGD-PTFE, and R/H-PTFE showing the binding energy (BE) and percentage of different carbon containing bonds.

| Element         | PTFE  |      | P-PTFE |      | DA-PTFE |      | RGD-PTFE |      | R/H-PTFE |      |
|-----------------|-------|------|--------|------|---------|------|----------|------|----------|------|
|                 | BE    | %    | BE     | %    | BE      | %    | BE       | %    | BE       | %    |
| C–C,<br>C=C     | 286.3 | 13.4 | 286.3  | 42.7 | 284.7   | 65.0 | 284.8    | 55   | 285.6    | 30.4 |
| C–N             | /     | /    | /      | /    | 285.7   | 8.0  | 285.6    | 20.6 | 286.4    | 2.8  |
| C–O             | /     | /    | 286.3  | 17.3 | 286.1   | 17.4 | 286.4    | 16.3 | 287.1    | 35.7 |
| C=O             | /     | /    | 287.8  | 0.8  | 287.9   | 6.3  | 287.8    | 4.0  | 288.5    | 29.3 |
| CF              | 289.9 | 1.0  | 289.2  | 0.1  | /       | /    | /        | /    | /        | /    |
| CF <sub>2</sub> | 293.1 | 52.9 | 292.6  | 25.2 | 292.0   | 2.7  | 292.1    | 3.0  | 292.8    | 1.2  |
| CF <sub>3</sub> | 294.4 | 32.7 | 293.7  | 13.9 | 292.5   | 0.7  | 292.4    | 1.1  | 294.2    | 0.6  |

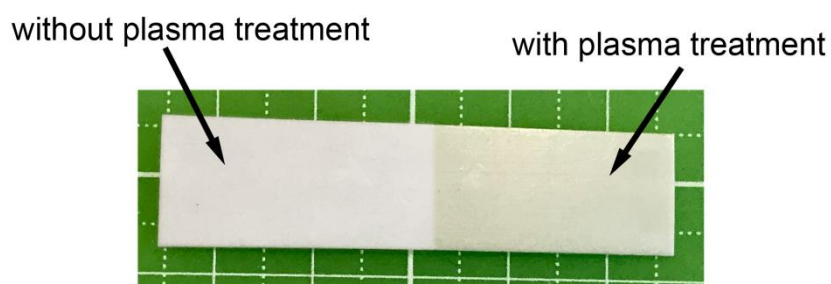

**Figure S1.** Digital photo of dopamine-coated PTFE (DA-PTFE) sheet. The left part was protected with tape during the O<sub>2</sub> plasma treatment. It was found that the plasma treatment greatly enhanced the dopamine coating efficiency.

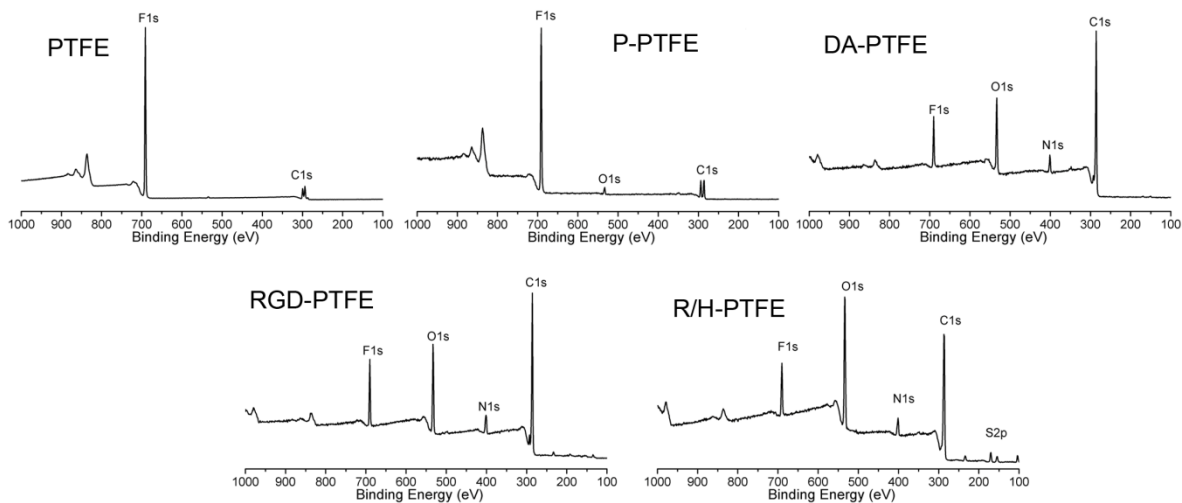

**Figure S2.** XPS survey scans of PTFE, P-PTFE, DA-PTFE, RGD-PTFE, and R/H-PTFE.

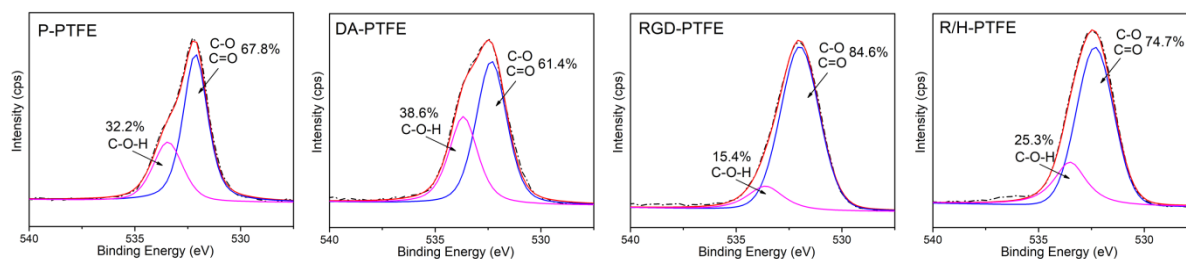

**Figure S3.** XPS O1s core level scans of P-PTFE, DA-PTFE, RGD-PTFE, and R/H-PTFE.

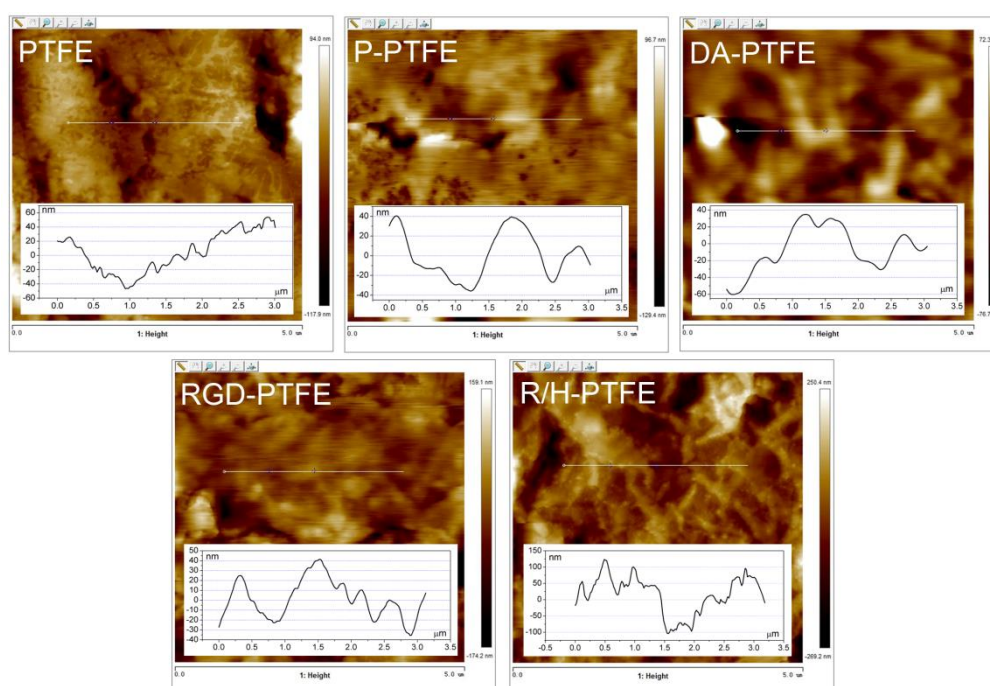

**Figure S4.** Cross-sectional AFM images and corresponding height profiles from the lines drawn on each image.

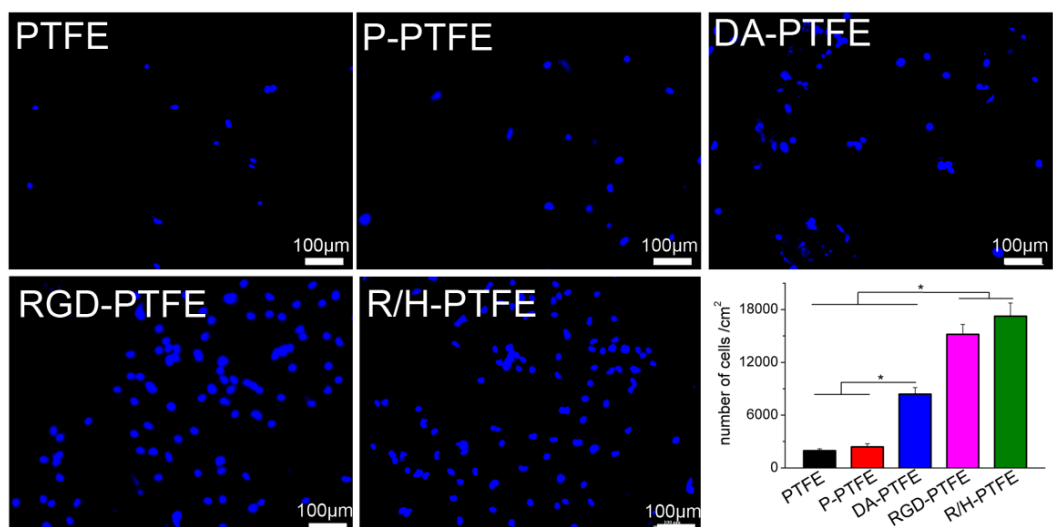

**Figure S5.** HUVEC attachment results after cell seeding for 4 h. Cell nuclei were stained with DAPI. The lower right diagram shows the statistical results of the number of cells attached to the different substrates.

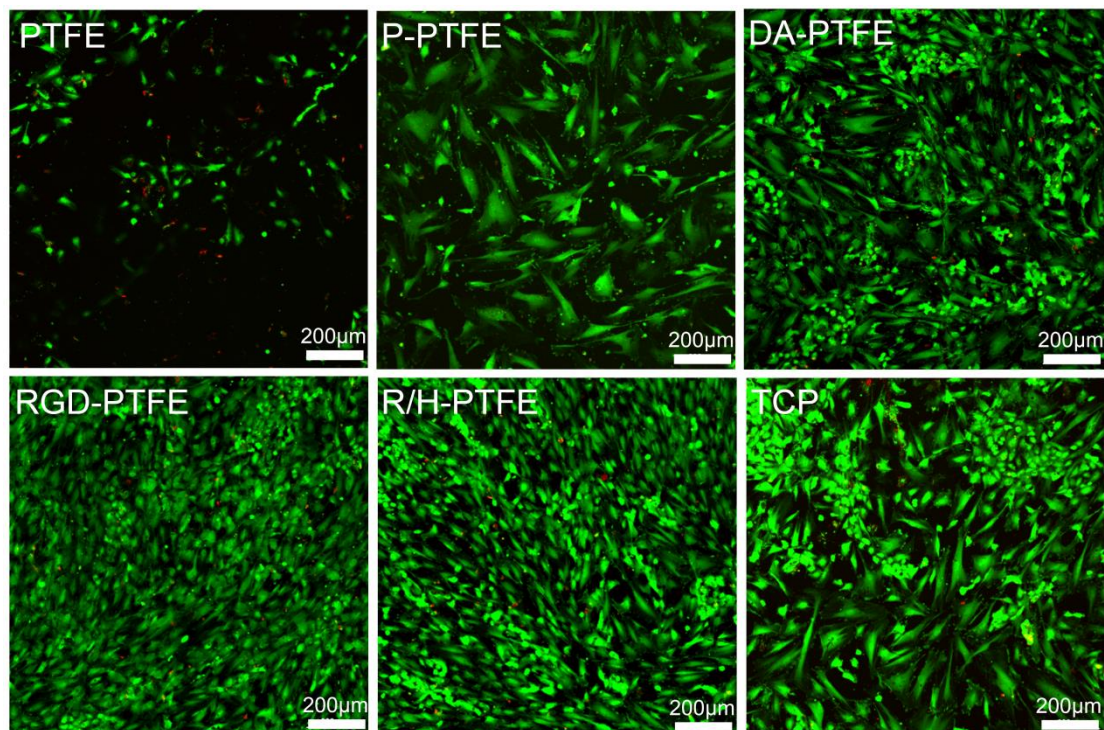

**Figure S6.** Fluorescence images of HUVECs cultured on different PTFE substrates for 14 days.

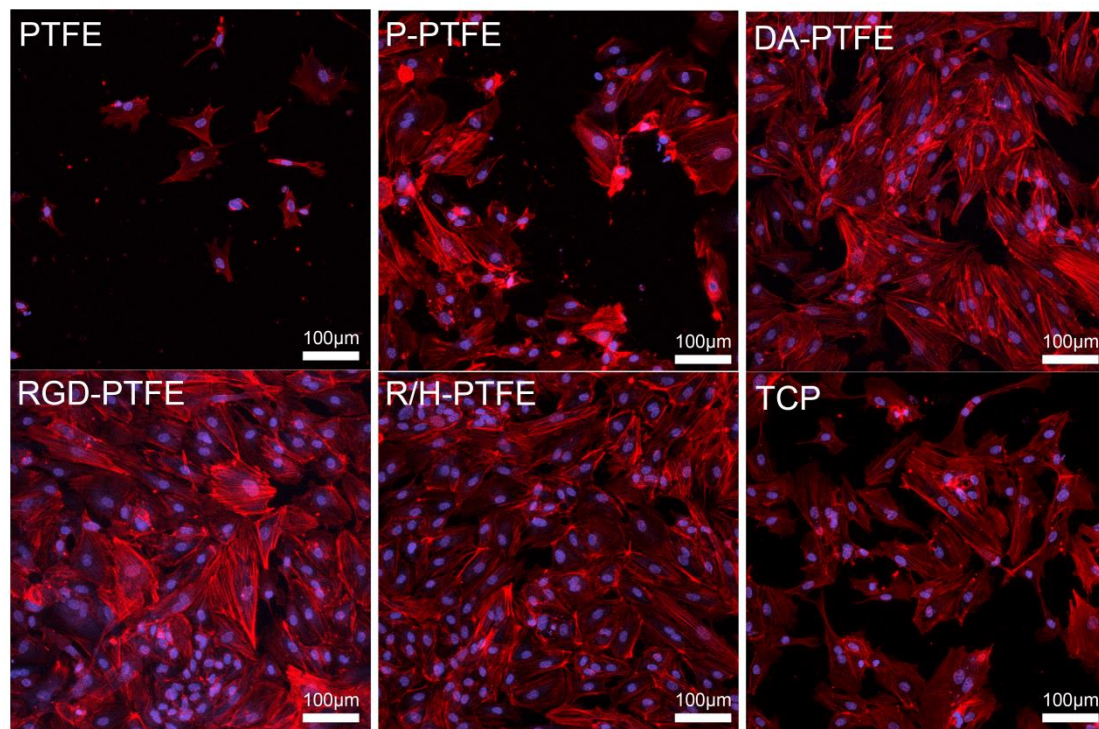

**Figure S7.** Fluorescence images showing the cytoskeleton of HUVECs cultured on different PTFE substrates for 14 days.
